# Supplementary material for: A gastric resident drug delivery system for prolonged gram-level dosing of tuberculosis treatment
Source: PubMed Central journal article supplement — Sci Transl Med. 2019 Mar 13;11(483):eaau6267. doi: 10.1126/scitranslmed.aau6267 (PMC7797620; doi:10.1126/scitranslmed.aau6267), 2019-03-13
Supplement: STM-11-aau6267-s004.pdf [file STM-11-aau6267-s004.pdf]

**Data file S2: Field questionnaire study to inform mode of administration.**

We have included the following documents in this file:

- 1) Healthcare provider questionnaire (English)
- 2) Patient questionnaire (English)
- 3) Patient questionnaire (Hindi)

## CONSENT TO PARTICIPATE IN INTERVIEW

Please read this form fully and consent where requested. You have been asked to participate in a study conducted by researchers at the Massachusetts Institute of Technology (M.I.T.) and Operation Asha in New Delhi. Insights gathered from you and other participants will be used in writing and publishing a paper and theses about patients with tuberculosis and healthcare providers who treat tuberculosis. Though direct quotes from you may be used in the paper with your permission, we will never ask you for your name or other identifying information. You were selected as a possible participant in this study because you are a healthcare provider who works with tuberculosis patients in India. You should read this information and ask questions about anything you do not understand before deciding whether or not to participate.

- This questionnaire is voluntary. You have the right not to answer any question, and to stop the questionnaire at any time or for any reason. In the event you choose to end the questionnaire, all information you provide will be deleted and omitted from the final paper. We expect that the questionnaire will take about 10-15 minutes.
- You will not be compensated for this questionnaire. You will receive no direct benefits from participating in this research study. However, your responses may help us learn more about developing drug delivery technologies for tuberculosis.
- If you have questions at any time about the study or the procedures, you may contact our research supervisor, Dr. Robert Langer via email at [rlanger@mit.edu](mailto:rlanger@mit.edu).
- This project will be completed by August 2018. All questionnaire responses will be stored securely.

I understand the procedures described above. My questions have been answered to my satisfaction, and I agree to participate in this study.

*(Please check all that apply)*

- I have read the above information, and I voluntarily agree to participate.**
- I am 18 years of age or older.**
- I give permission for any direct quotes from in this questionnaire to be included in publications resulting from this study.**

If you feel you have been treated unfairly, or you have questions regarding your rights as a research subject, you may contact the Chairman of the Committee on the Use of Humans as Experimental Subjects, M.I.T., Room E25-143b, 77 Massachusetts Ave, Cambridge, MA, USA 02139, phone 1-617-253-6787.

For any questions about the questionnaire, please contact the study coordinators, Daniel Fulop (+91 98118 73418) or Malvika Verma (+91 70427 70938).

1. What is the name of the facility that you currently work in?

\_\_\_\_\_

2. What type of facility do you currently work in? Mark all that apply.

- \_\_\_\_\_ Sub Centre
- \_\_\_\_\_ Primary Health Centre
- \_\_\_\_\_ Community Health Centre
- \_\_\_\_\_ Sub-divisional Hospital
- \_\_\_\_\_ District Hospital
- \_\_\_\_\_ Tuberculosis Clinic
- \_\_\_\_\_ Tuberculosis Hospital
- \_\_\_\_\_ Medical College
- \_\_\_\_\_ Private Clinic
- \_\_\_\_\_ Mobile Clinic
- \_\_\_\_\_ Operation ASHA DOTS Clinic
- \_\_\_\_\_ Other: \_\_\_\_\_

3. How many patients do you see per working day? *Please provide a number estimate.*

- \_\_\_\_\_ Less than 10
- \_\_\_\_\_ 10-20
- \_\_\_\_\_ 20-50
- \_\_\_\_\_ 50-100
- \_\_\_\_\_ More than 100

4. How many patients suffering from tuberculosis do you see per working day? *Please provide a number estimate.*

- \_\_\_\_\_ Less than 10
- \_\_\_\_\_ 10-20
- \_\_\_\_\_ 20-50
- \_\_\_\_\_ 50-100
- \_\_\_\_\_ More than 100

5. How much time on average do you spend with a patient suffering from tuberculosis during a (non-diagnostic) visit? *Please provide a number estimate.*

- \_\_\_\_\_ Less than 5 minutes
- \_\_\_\_\_ 5-10 minutes
- \_\_\_\_\_ 10-30 minutes
- \_\_\_\_\_ 30-60 minutes
- \_\_\_\_\_ More than 60 minutes

6. On average, how often do you see patients with tuberculosis?

- Every day
- 2-3 times a week
- Once a week
- Several times a month
- Once a month
- Once every 6 months or less often
- Never

7. Out of 100 patients, how many patients do you think miss a dose of their regimen?

out of 100

8. Why do you think patients miss a dose of their regimen? *Mark all that apply.*

- The patient suffers from side effects from the medication.
- The patient feels that the medication does not work or the patient sees no effect from taking the medication.
- The patient feels better and does not think he or she needs the medication.
- The patient forgot to take the medication.
- The patient moved or went to visit a different city and was unable to come to the clinic.
- The patient feels a social stigma associated with taking the medication.
- The patient is unable or does not want to come to the clinic.

If you selected “The patient is unable or does not want to come to the clinic,” please continue to question 8A. Otherwise continue to question 8B.

8A. Why is the patient unable or why does the patient not want to come to the clinic?

\_\_\_\_\_

8B. Do you have any other reasons why patients might skip taking their medication?

\_\_\_\_\_

9. What can happen to patients who skip doses of tuberculosis medication? Mark all that apply.

- They can get better.
- They can stay sick and never get better.
- They can infect others with tuberculosis.
- It can be harder to treat tuberculosis in the future.
- They can die.
- Other: \_\_\_\_\_

10. If you had 100 rupees to help your patients adhere to treatment, how would you allocate it amongst the following programs? The total cost should add up to 100 rupees. Use integer numbers only.

\_\_\_\_\_ rupees to develop a medicine that can reduce number of times medication is taken: for example, only needing to take medication once a week or once a month, to replace the current 3-7 times a week.

\_\_\_\_\_ rupees to send reminders to patients to take their medication via cell phone call or SMS 3-7 times a week.

\_\_\_\_\_ rupees to send a healthcare worker or family member to the patient's home to remind them to take medication.

\_\_\_\_\_ rupees to provide a reward to patients if they take their medication.

We are developing solutions to provide anti-tuberculosis medication less frequently at the hospital. This would take the place of the patient coming to the tuberculosis clinic every day. We are working on different strategies to do this.

One strategy involves a Ryle's (nasogastric) tube placement for deployment of a drug delivery device with tuberculosis medication. Following deployment of the device, the Ryle's (nasogastric) tube can be removed in the same visit as deployment. After all the medication has been released, the patient will return to the hospital for a new drug delivery device to be deployed via the Ryle's (nasogastric) tube.

11. Have you inserted a Ryle's (nasogastric) tube in a patient previously?

\_\_\_\_\_ Yes

\_\_\_\_\_ No

12. How many times have you placed a Ryle's (nasogastric) tube in a patient during the last year?

\_\_\_\_\_ 0

\_\_\_\_\_ 1-10 times

\_\_\_\_\_ 10-50 times

\_\_\_\_\_ 50-100 times

\_\_\_\_\_ 100-200 times

\_\_\_\_\_ More than 200 times

13. Do you agree or disagree with the following statements?

Agree \_\_\_ or Disagree \_\_\_ Ryle's (nasogastric) tubes can be used with patients infected with tuberculosis.

Agree \_\_\_ or Disagree \_\_\_ Our hospital (or clinic if *not* part of a hospital) places Ryle's (nasogastric) tubes.

If you selected Agree for "Our clinic/hospital places Ryle's (nasogastric) tubes," please continue to question 13A. Otherwise continue to question 14.

13A. Who is responsible for placing Ryle's (nasogastric) tubes in patients at your clinic/hospital?

- \_\_\_\_\_ Medical student
- \_\_\_\_\_ Medical intern/resident (MBBS/MD)
- \_\_\_\_\_ Fellow (MBBS/MD)
- \_\_\_\_\_ Attending/Consultant Generalist provider
- \_\_\_\_\_ Attending/Consultant Specialist provider
- \_\_\_\_\_ Attending/Consultant Infectious disease specialist provider
- \_\_\_\_\_ Pharmacy Student
- \_\_\_\_\_ Pharmacist (B-PHARMA)
- \_\_\_\_\_ Nurse (GNM)
- \_\_\_\_\_ Nurse (BSc.N)
- \_\_\_\_\_ Nurse practitioner
- \_\_\_\_\_ Medical Assistant
- \_\_\_\_\_ Other: \_\_\_\_\_

14. Would you (or your staff) be able to place Ryle's (nasogastric) tubes to deliver a drug delivery device with tuberculosis medication?

- \_\_\_\_\_ Yes
- \_\_\_\_\_ No

15. Do you anticipate any challenges in providing these in your practice?

- \_\_\_\_\_ No
- \_\_\_\_\_ Yes

If you selected "Yes," what are the challenges? *Mark all that apply.*

- \_\_\_\_\_ Ryle's (nasogastric) tube procedures will require training of myself and my clinical support staff.
- \_\_\_\_\_ A Ryle's (nasogastric) tube procedure will take too long.
- \_\_\_\_\_ Patients will not agree to the Ryle's (nasogastric) tube procedure.
- \_\_\_\_\_ Other: \_\_\_\_\_

Additionally, we are exploring alternative methods that involve taking up to 30 large capsules in one visit to the hospital to deliver tuberculosis medication.

16. Would you (or your staff) be able to support the directly observed administration of these capsules?

- Yes
- No

17. Do you anticipate any challenges in providing these in your practice?

- No
- Yes

If you selected “Yes,” what are the challenges? *Mark all that apply.*

- Direct observation of administering 30 large capsules will require training of myself and my clinical support staff.
- Direct observation of administering 30 large capsules will take too long.
- Patients will not agree to swallowing 30 large capsules in one visit.
- Other: \_\_\_\_\_

Another strategy we are exploring involves drinking 2 liters of water, which contains tuberculosis medication. The water and medication mixture would need to be administered during one visit to the hospital.

18. Would you (or your staff) be able to support the directly observed administration of 2 liters of water-medication mixture?

- Yes
- No

19. Do you anticipate any challenges in providing these in your practice?

- No
- Yes

If you selected “Yes,” what are the challenges? *Mark all that apply.*

- Direct observation of administering 2 liters of the water-drug mixture will require training of myself and my clinical support staff.
- Direct observation of administering 2 liters of the water-drug mixture will take too long.
- Patients will not agree to drinking 2 liters of the water-drug mixture in one visit.
- Other: \_\_\_\_\_

20. Depending on the availability of these different methods, do you think patients suffering from tuberculosis would be willing to take their medication using any of these options? All the options would need to be directly observed at your clinic/hospital. **Check all that apply.**

- Swallowing 30 capsules
- Ryle's (nasogastric) tube
- Drinking 2 liters of water-drug mixture

If you selected "Swallowing 30 capsules," then go to 20A.  
If you selected "Ryle's (nasogastric) tube", then go to 20B.  
If you selected "Drinking 2 liters of water-drug mixture", then go to 20C.

20A. How many times do you believe patients would be willing to come to the tuberculosis clinic to swallow 30 capsules in 1 one visit?

- Once per week
- Twice per month
- Once per month
- Once every 2 months
- Once every 4 months

20B. How many times do you believe patients would be willing to come to the tuberculosis clinic to have a device inserted through the Ryle's tube?

- Once per week
- Twice per month
- Once per month
- Once every 2 months
- Once every 4 months

20C. How many times do you believe patients would be willing to come to the tuberculosis clinic to drink 2 liters of a water-drug mixture?

- Once per week
- Twice per month
- Once per month
- Once every 2 months
- Once every 4 months



Demographics:

21. Are you between the age of

\_\_\_\_\_ 18-24?

\_\_\_\_\_ 25-34?

\_\_\_\_\_ 35-44?

\_\_\_\_\_ 45-54?

\_\_\_\_\_ 55-64?

\_\_\_\_\_ 65-74?

\_\_\_\_\_ 75+?

22. What is your gender?

\_\_\_\_\_ Male

\_\_\_\_\_ Female

\_\_\_\_\_ Other

23. What is your highest level of education?

\_\_\_\_\_ Nursing degree (GNM, BSc.N, NP)

\_\_\_\_\_ Professional degree (MBBS/MD) \_\_\_\_\_

\_\_\_\_\_ Doctoral degree (PhD) \_\_\_\_\_

24. Which of the following best describes you:

\_\_\_\_\_ Medical student

\_\_\_\_\_ Medical intern/resident (MBBS/MD)

\_\_\_\_\_ Fellow (MBBS/MD)

\_\_\_\_\_ Attending/Consultant Generalist provider

\_\_\_\_\_ Attending/Consultant Specialist provider

\_\_\_\_\_ Attending/Consultant Infectious disease specialist provider

\_\_\_\_\_ Pharmacist (B-PHARMA)

\_\_\_\_\_ Nurse (GNM)

\_\_\_\_\_ Nurse (BSc.N)

\_\_\_\_\_ Nurse practitioner

\_\_\_\_\_ Medical Assistant

\_\_\_\_\_ Other: \_\_\_\_\_

25. How long have you worked on the treatment of tuberculosis?

\_\_\_\_\_ Less than 1 year

\_\_\_\_\_ 1-5 years

\_\_\_\_\_ 6-10 years

\_\_\_\_\_ 11-15 years

\_\_\_\_\_ More than 15 years

*[Fill this out before each interview. The information below refers to the location of the hospital or clinic.]*

-----

Hospital/Clinic Name:

Interpreter's Name:

Date:

-----

**Before Consent:**

Have you already been surveyed?

\_\_\_\_\_ Yes

\_\_\_\_\_ No

*[If subject answers No, then continue with consent form.]*

**Before Interview:**

*[Ensure subject agrees to participate in the interview by reading the lines below:]*

**CONSENT TO PARTICIPATE IN INTERVIEW**

You have been asked to participate in a research study conducted by researchers at the Massachusetts Institute of Technology (M.I.T.) and Operation Asha in New Delhi. We have come here to understand your experience at the clinic today. Insights gathered from you and other participants will be used in writing and publishing a paper and theses about patients with tuberculosis and doctors who treat tuberculosis. Though direct quotes from you may be used in the paper with your permission, we will never ask you for your name or other identifying information. You were selected as a possible participant in this study because you are a patient at a tuberculosis clinic in India. You should listen to this information and ask questions about anything you do not understand before deciding whether or not to participate.

- This interview is voluntary. You have the right not to answer any question, and to stop the interview at any time or for any reason. In the event you choose to end the interview, all information you provide will be deleted and omitted from the final paper. We expect that the interview will take about 10-15 minutes.
- You will not be compensated for this interview, and what you say or do will not affect your treatment in any way.
- This project will be completed by August 2018. All questionnaire responses will be stored securely.

Please respond True or False to each option below:

You understand the procedures described above. Your questions have been answered to your satisfaction, and you agree to participate in this study.

You are 18 years of age or older.

You give permission for any direct quotes from this interview to be included in publications resulting from this study.

*[Ensure subject responds True to all three statements and then take their fingerprint as evidence of consent:]*

If you feel you have been treated unfairly, or you have questions regarding your rights as a research subject, you may contact the Chairman of the Committee on the Use of Humans as Experimental Subjects, M.I.T., Room E25-143b, 77 Massachusetts Ave, Cambridge, MA, USA 02139, phone 1-617-253-6787

We will now begin the interview. Any answers you provide will not affect your treatment. Please be honest with your answers, as this will support us in our research on tuberculosis to help patients.

**Interview:**

1. Are you at the clinic today to receive treatment for tuberculosis?

\_\_\_\_\_ Yes

\_\_\_\_\_ No

*[If subject answers Yes, then continue to question 2. Otherwise say: "Thank you very much" and stop the survey.]*

2. Why are you at the tuberculosis clinic today?

\_\_\_\_\_ Directly observed treatment

\_\_\_\_\_ Routine monitoring

\_\_\_\_\_ Had side effects from treatment

\_\_\_\_\_ Other \_\_\_\_\_

3. How much time did you spend commuting to the tuberculosis clinic today?

\_\_\_\_\_ Less than 10 minutes

\_\_\_\_\_ 10-30 minutes

\_\_\_\_\_ 30-60 minutes

\_\_\_\_\_ 60-90 minutes

\_\_\_\_\_ More than 90 minutes → About how long? \_\_\_\_\_

4. How much did it cost to commute to the tuberculosis clinic today?

\_\_\_\_\_ Zero rupees

\_\_\_\_\_ 1-10 rupees

\_\_\_\_\_ 10-50 rupees

\_\_\_\_\_ 50-100 rupees

\_\_\_\_\_ 100-300 rupees

\_\_\_\_\_ 300-500 rupees

\_\_\_\_\_ More than 500 rupees → About how much? \_\_\_\_\_

5. Did you have to miss work/school or arrange for paid child care to come to the tuberculosis clinic today?

\_\_\_\_\_ Yes: Work \_\_\_\_\_ School \_\_\_\_\_ Childcare \_\_\_\_\_

\_\_\_\_\_ No:

\_\_\_\_\_ Not Applicable

6. Respond True \_\_\_ or False \_\_\_ or Not sure \_\_\_ for the following statements:

True \_\_\_ or False \_\_\_ or Not Sure \_\_\_ Tuberculosis is caused by bacteria.

True \_\_\_ or False \_\_\_ or Not Sure \_\_\_ Tuberculosis is directly caused by smoking.

True \_\_\_ or False \_\_\_ or Not Sure \_\_\_ Tuberculosis directly causes lung cancer.

True \_\_\_ or False \_\_\_ or Not Sure \_\_\_ Tuberculosis can be cured.

7. Out of 100 patients with tuberculosis, how many do you think miss a dose of their regimen?  
\_\_\_\_\_ out of 100

8. Thinking about a time or times you missed a dose of your tuberculosis medication, please respond True or False:

[Change first person to 3<sup>rd</sup> person]

True \_\_\_ or False \_\_\_ I missed a dose because I suffered from side effects from the medication.

True \_\_\_ or False \_\_\_ I missed a dose because I feel that the medication does not work or I see no effect from taking the medication.

True \_\_\_ or False \_\_\_ I missed a dose because I felt better and did not think I needed the medication.

True \_\_\_ or False \_\_\_ I missed a dose because I forgot to take my medication.

True \_\_\_ or False \_\_\_ I moved or went to visit a different city and was unable to come to the clinic.

True \_\_\_ or False \_\_\_ I missed a dose because I came to the clinic, but there was nobody here to give me my treatment.

True \_\_\_ or False \_\_\_ I was unable or did not want to come to the clinic.

*[If subject answers True to "I was unable or did not want to come to the clinic", then go to 8A. Otherwise, go to 8B.]*

8A. Why were you unable or why did you not want to come to the clinic?

---

8B. Do you have any other reasons why you might be unable to take your medication?

---

9. What can happen to people with tuberculosis who skip doses of tuberculosis medication?

Respond True or False or Not Sure:

True \_\_\_ or False \_\_\_ or Not sure \_\_\_ They can get better.

True \_\_\_ or False \_\_\_ or Not sure \_\_\_ They can stay sick and never get better.

True \_\_\_ or False \_\_\_ or Not sure \_\_\_ They can infect others with tuberculosis.

True \_\_\_ or False \_\_\_ or Not sure \_\_\_ It can be harder to treat tuberculosis in the future.

True \_\_\_ or False \_\_\_ They can die.

10. Respond True or False if you think the following solutions would help you follow a treatment regimen.

True \_\_\_ or False \_\_\_ Reduce number of times medication is taken: for example, only needing to take medication once a week or once a month, to replace the current 3-7 times/week treatment. The medicine would still be just as effective, you would simply need to take it less frequently. The total treatment period remains the same.

True \_\_\_ or False \_\_\_ Send reminders to take medication via a cell phone call or SMS 3-7 times a week.

True \_\_\_ or False \_\_\_ Have a healthcare worker or family member come to your home to remind you take medication.

True \_\_\_ or False \_\_\_ Provide a reward to you if you take your medication.

We are developing solutions so that you can get medicine less frequently at the hospital. For example, you can go to the hospital once a week, once every 2 weeks, or once a month at a hospital. This would take the place of going to the tuberculosis clinic every day and save you time and money. We have different strategies to do this:

(A) One involves swallowing 30 large capsules in one visit to the hospital.

*[Show jar with 30 “000” size capsules]*

(B) Another involves the use of a Ryle’s (nasogastric) tube to deploy a device containing your tuberculosis medication.

*[Remove Ryle’s (nasogastric) tube from package and show it to patient. Do not give it to them until later.]*

This is how a Ryle’s (nasogastric) tube works: First the doctor will put on a pair of clean gloves. Then the doctor will explain the Ryle’s (nasogastric) tube procedure to you. The doctor will apply xylocaine jelly, a local anesthetic, to prevent pain and make sure the Ryle’s (nasogastric) tube passes through your nose into your stomach. The xylocaine jelly will be applied to the tube and act as a lubricant.

*[Show picture 1]*

Then the tube is inserted through one nostril into the nose as shown here. The end of the tube travels all the way into the stomach as shown in this picture.

*[Show picture 2]*

Ryle’s (nasogastric) tubes are commonly used for feeding and administering drugs when patients cannot swallow. The device containing your tuberculosis medicine will be inserted into the Ryle’s (nasogastric) tube and deployed into the stomach. Following deployment of the device, the Ryle’s (nasogastric) tube can be removed during the same visit to the hospital, so the whole procedure will last less than 10 minutes.

So, a doctor at a hospital will deploy a device through a Ryle’s (nasogastric) tube into the stomach. This device will gradually release your medication. After all the medication has been



released, you will return to the hospital and have a Ryle's (nasogastric) tube placed again to remove the device and put in a new device for the next round of medication.

Here is a Ryle's (nasogastric) tube.

*[Give subject the Ryle's (nasogastric) tube to hold.]*

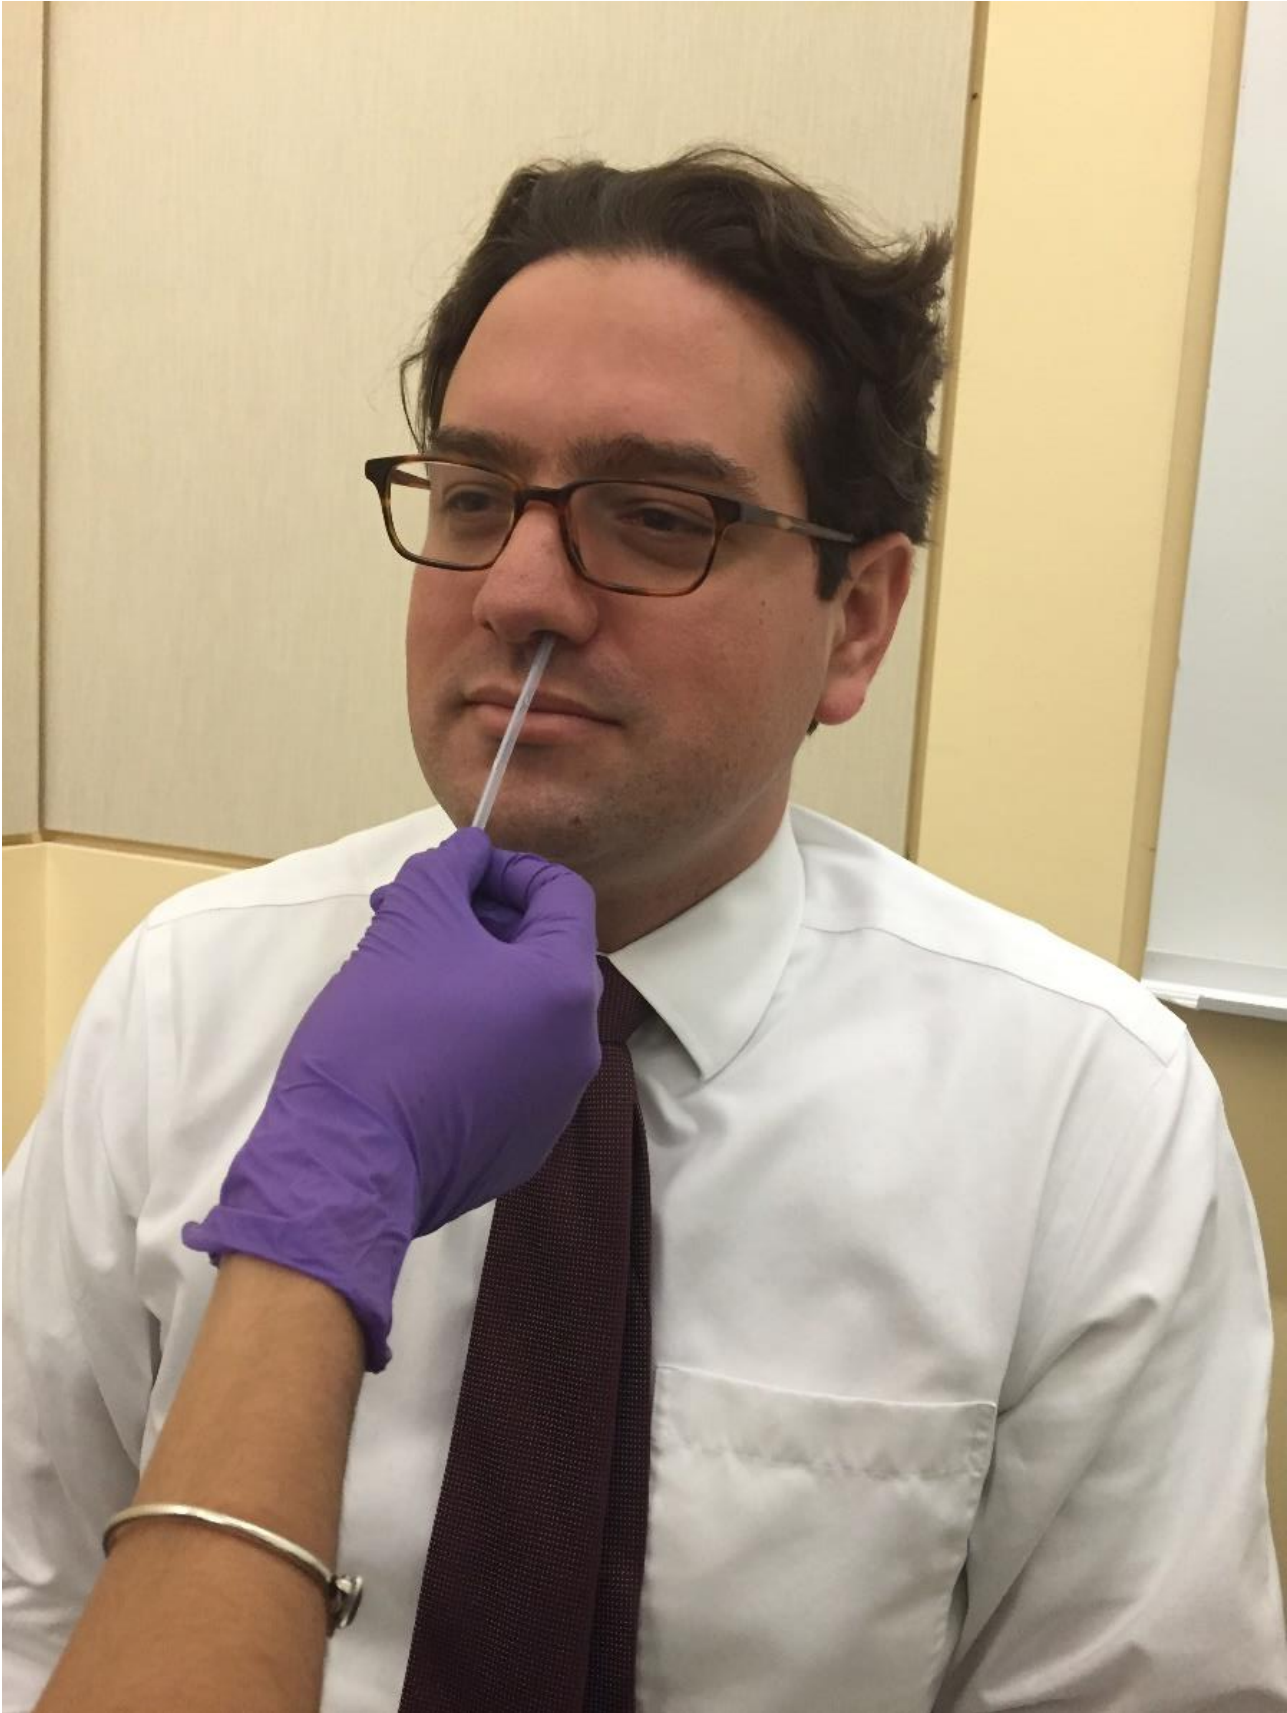

Picture 1

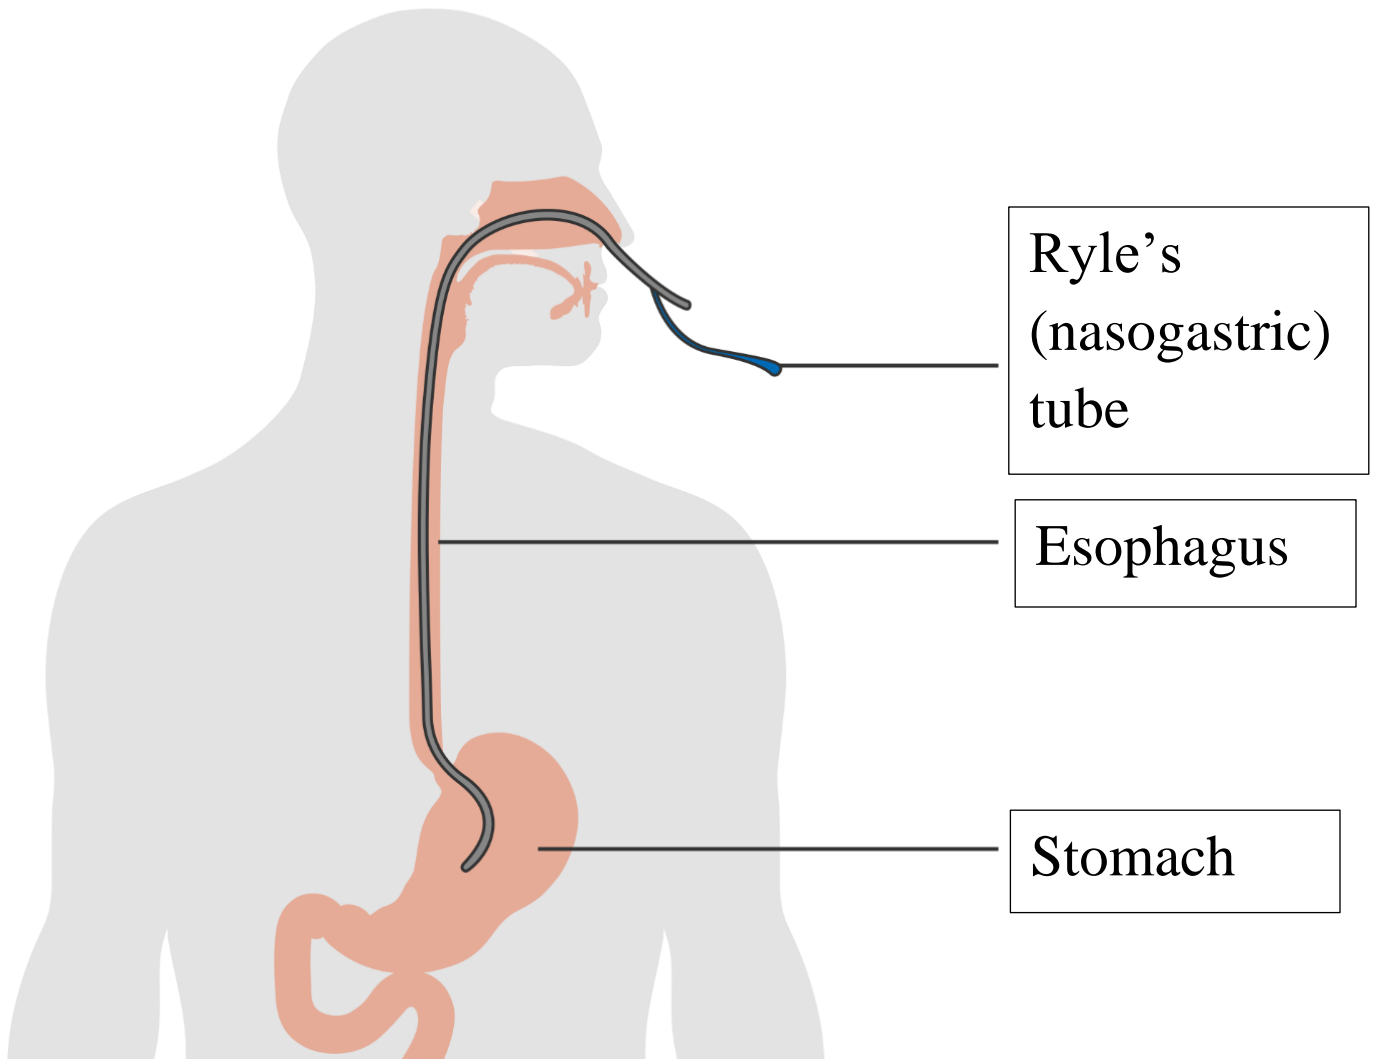

Picture 2

Attributed to Cancer Research UK

([https://commons.wikimedia.org/wiki/File:Diagram\\_showing\\_the\\_position\\_of\\_a\\_nasogastric\\_tube\\_CRUK\\_340.svg](https://commons.wikimedia.org/wiki/File:Diagram_showing_the_position_of_a_nasogastric_tube_CRUK_340.svg)), <https://creativecommons.org/licenses/by-sa/4.0/legalcode>

(C) Another strategy involves drinking 2 liters of water, which contains the drug. The water-drug mixture would need to be swallowed in one visit to the hospital.

*[Show one 2L bottle of Bisleri.]*

11. Depending on the availability of these different methods, would you be willing to do any of these options? All of these options would be directly observed at the tuberculosis clinic.

Respond Yes if you are willing and No if you are unwilling.

*[Read out all options to subject and show pictures of the options. Mark which ones they are willing.]*

Yes\_\_\_\_\_ or No\_\_\_\_\_

*[If subject answers "Yes" then check boxes below.]*

11A.

- \_\_\_\_\_ Swallowing 30 capsules
- \_\_\_\_\_ Ryle's (nasogastric) tube
- \_\_\_\_\_ Drinking 2 liters of water-drug mixture

*[If subject answers "Swallowing 30 capsules", then go to 11A. If subject answers "Ryle's (nasogastric) tube", then go to 11B. If subject answers "Drinking 2 liters of water-drug mixture", then go to 11C.]*

11A\_1. How many times would you be willing to come to the tuberculosis clinic to swallow 30 capsules in 1 one visit?

- \_\_\_\_\_ Once per week
- \_\_\_\_\_ Twice per month
- \_\_\_\_\_ Once per month
- \_\_\_\_\_ Once every 2 months
- \_\_\_\_\_ Once every 4 months

11A\_2. How many times would you be willing to come to the tuberculosis clinic to have a device inserted through the Ryle's tube?

- \_\_\_\_\_ Once per week
- \_\_\_\_\_ Twice per month
- \_\_\_\_\_ Once per month
- \_\_\_\_\_ Once every 2 months
- \_\_\_\_\_ Once every 4 months

11A\_3. How many times would you be willing to come to the tuberculosis clinic to drink 2 liters of a water-drug mixture?

- \_\_\_\_\_ Once per week
- \_\_\_\_\_ Twice per month
- \_\_\_\_\_ Once per month

\_\_\_\_\_ Once every 2 months

\_\_\_\_\_ Once every 4 months

12. Have you ever had a Ryle's (nasogastric) tube placed in your stomach?

\_\_\_\_\_ Yes

\_\_\_\_\_ No

\_\_\_\_\_ Don't know/don't remember

13. On this scale, how would you perceive the discomfort of a Ryle's (nasogastric) tube placement? \_\_\_\_\_

*[Show Picture 3 and have subject point to number on scale.]*

14. On this scale, how would you perceive the discomfort of swallowing all 30 capsules in this jar in 1 visit to the hospital? \_\_\_\_\_

*[Show Picture 3 and have subject point to number on scale.]*

15. On this scale, how would you perceive the discomfort of drinking 2 liters of water in 1 visit to the hospital? \_\_\_\_\_

*[Show Picture 3 and have subject point to number on scale.]*

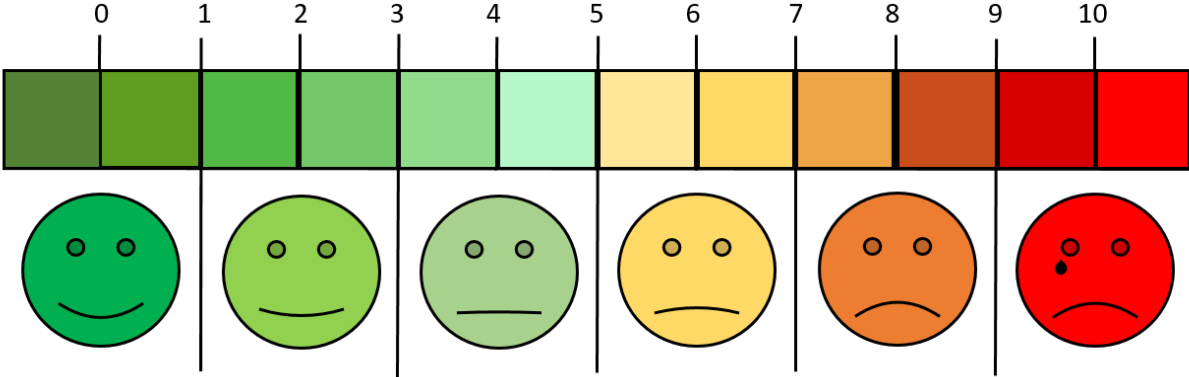

Picture 3: Visual Analog Scale

Demographics:

16. Are you between the ages of

\_\_\_\_\_ 18-24?

\_\_\_\_\_ 25-34?

\_\_\_\_\_ 35-44?

\_\_\_\_\_ 45-54?

\_\_\_\_\_ 55-64?

\_\_\_\_\_ 55-64?

\_\_\_\_\_ 65-74?

\_\_\_\_\_ 75+

17. What is your gender?

\_\_\_\_\_ Male

\_\_\_\_\_ Female

\_\_\_\_\_ Other

18. What is your highest current level of education?

\_\_\_\_\_ No formal education

\_\_\_\_\_ 1<sup>st</sup>-5<sup>th</sup> standard

\_\_\_\_\_ 6<sup>th</sup>-8<sup>th</sup> standard

\_\_\_\_\_ 9<sup>th</sup>-10<sup>th</sup> standard

\_\_\_\_\_ 11-12<sup>th</sup> standard

\_\_\_\_\_ Bachelor

\_\_\_\_\_ Master

\_\_\_\_\_ Professional degree

\_\_\_\_\_ Doctoral degree

19. What is your level of employment?

\_\_\_\_\_ Employed for wages

\_\_\_\_\_ Self-employed

\_\_\_\_\_ Out of work and looking for work

\_\_\_\_\_ Out or work but not currently looking for work

\_\_\_\_\_ Homemaker

\_\_\_\_\_ Student

\_\_\_\_\_ Retired

\_\_\_\_\_ Other

20. How many hours do you work (or go to classes) in a day?

\_\_\_\_\_ Hours per day

21. How many days do you work (or go to classes) in a week?

\_\_\_\_\_ Days per week

22. How often do you come to the clinic per week?

\_\_\_\_\_ 1X a week

\_\_\_\_\_ 2X a week

\_\_\_\_\_ 3X a week

\_\_\_\_\_ 4X a week

\_\_\_\_\_ 5X a week

\_\_\_\_\_ 6X a week

\_\_\_\_\_ Every day

\_\_\_\_\_ I come once every 2 weeks.

\_\_\_\_\_ I come around once per month or less frequently.

23. In a typical visit, how much time passes from when you enter the clinic to when you leave the clinic?

\_\_\_\_\_ Less than 10 minutes

\_\_\_\_\_ 10-30 minutes

\_\_\_\_\_ 30-60 minutes

\_\_\_\_\_ More than 60 minutes → About how long? \_\_\_\_\_

24. Is there anything else you would like to tell me about your experience at the clinic?

---



स्थानीय भाषा ( हिंदी ) के प्रत्यक्ष साक्षात्कार में प्रयोग किये जाने हेतु

प्रत्येक साक्षात्कार के पहले इसे जरूर भरें. नीचे दी गयी सूचना चिकित्सालय या क्लीनिक के स्थान के बारे में है .

ग्रामीण क्षेत्र या शहर

जिला

निकटतम शहर

राज्य

अस्पताल/ क्लीनिक का नाम

प्रशासक का नाम

दिनांक

अनुमति लेने के पहले

क्या आप इस सर्वेक्षण में पहले ही भाग ले चुके हैं?

हाँ\_\_\_\_\_

नहीं\_\_\_\_\_

(अगर प्रतिभागी नहीं में उत्तर देता है तब सहमति की प्रक्रिया आगे बढ़ाएं.)

साक्षात्कार के पहले

{सुनिश्चित करें कि अनुभागी साक्षात्कार से पहले निम्नलिखित बातों से सहमत हो }

आप से एक ऐसे शोध का हिस्सा बनने के लिए सहमति मांगी गयी है जो मेसाचुसेट्स इंस्टिट्यूट ऑफ़ टेक्नोलॉजी एवं ऑपरेशन आशा के खोजकर्ता द्वारा नयी दिल्ली में संचालित किया जा रहा है. हम आज यहाँ आपके क्लीनिक के अनुभवों को जानने के लिए आये हैं.आपके व अन्य अनुभागियों के अनुभवों का प्रयोग 'तपेदिक (टी.बी.) के रोगियों और इसका इलाज करने वाले डॉक्टर के बारे में खोजपत्र लिखने और प्रकाशित करने में किया जायेगा. यद्यपि आपकी कही हुई प्रत्यक्ष बातों का उल्लेख आपकी अनुमति से खोजपत्र में किया जा सकता है लेकिन आपका नाम और आपसे जुड़ी किसी पहचान के बारे में हम नहीं पूछेंगे. आपको इस कार्य के लिए चुना गया है क्योंकि आप टी.बी. के रोगी हैं और भारत के ट्यूबरक्लोसिस क्लीनिक में इलाज करा रहे हैं. आप को यह सूचना ध्यान से सुननी चाहिए और भाग लेने से पहले जो भी आपको न समझ में आ रहा हो उसके बारे में सवाल पूछ सकते हैं.

यह एक ऐच्छिक साक्षात्कार है.आपको किसी भी प्रश्न का उत्तर न देने का अधिकार है,और आप इस साक्षात्कार को किसी भी समय किसी भी कारण से छोड़ सकते हैं. अगर आप साक्षात्कार छोड़ने का निर्णय लेते हैं तो आपके द्वारा दी गयी सारी जानकारी को अंतिम खोजपत्र में से हटा दिया जायेगा. इस साक्षात्कार में 10 से 15 मिनट का समय लगने की संभावना है.

इस साक्षात्कार के लिए आपको कोई भुगतान नहीं किया जायेगा, और आप जो भी कहेंगे या करेंगे उसका आपके इलाज पर कोई प्रभाव नहीं पड़ेगा.

यह प्रोजेक्ट अगस्त 2018 तक पूरा हो जायेगा . सभी प्रश्नसूचि के उत्तरों को सुरक्षित करके रखा जायेगा.

कृपया नीचे दिए गए विकल्पों का हाँ या नहीं में उत्तर दें.

- आप ऊपर बताई गयी पूरी प्रक्रिया को समझ गए हैं.आपके प्रश्नों का संतुष्ट उत्तर आपको मिल गया है, और आप इस शोध में भाग लेने के लिए तैयार हैं.
- आप 18 साल या इससे ज्यादा उम्र के हैं.
- आप हमें इस साक्षात्कार में आपके द्वारा कही गयी किसी भी प्रत्यक्ष उक्ति को शोधपत्र में शामिल करने की अनुमति देते हैं.

(सुनिश्चित करें की अनुभागी सभी तीन बयानों के हाँ में जवाब दे और इसके बाद सहमति पत्र पर अनुभागी के अंगूठे का निशान लें.)

अगर आपको लगता है की आपके साथ सही व्यवहार नहीं किया गया या अगर आपके खोज विषय से जुड़े कुछ प्रश्न हैं तो आप “मानवों के प्रयोगात्मक विषय की तरह प्रयोग समिति” के चेयरमैन, एम् आई टी , कमरा संख्या E- 25 - 143B , 77 मेसाचुसेट्स एव, कैंब्रिज, USA 02139, फोन- 1-617-253-6787 से संपर्क कर सकते हैं.

अब हम इस कार्य की शुरुआत करेंगे. आपका दिया हुआ कोई भी उत्तर आपके इलाज को प्रभावित नहीं करेगा. कृपया ईमानदारी से उत्तर दें क्योंकि ये उत्तर टी.बी. रोगियों की मदद के लिए किये जा रहे हमारे खोज में मददगार होंगे.

साक्षात्कार

1- क्या आप आज टी.बी. के इलाज के लिए क्लीनिक आये हैं ?

हाँ-----

नहीं -----

( अगर अनुभागी का उत्तर हाँ में है तभी साक्षात्कार आगे बढ़ाएं वरना " धन्यवाद" कह कर सर्वेक्षण यही रोक दें.)

2- आप आज टी.बी. क्लीनिक में क्यों आये हैं ?

- प्रत्यक्ष इलाज के लिए: (DOTS) के लिये
- सामान्य निगरानी के लिए
- इलाज से हुए दुष्प्रभाव कि वजह से
- अन्य

3- आपको टी.बी. क्लीनिक तक आने में आज कितना समय लगा?

-----10 मिनट से कम

-----10 से 30 मिनट तक

-----30 से 60 मिनट तक

-----60 से 90 मिनट तक

-----90 मिनट से ज्यादा ----- लगभग कितना समय ?

4- टी.बी. क्लीनिक तक आने में आज आपका कितना खर्च हुआ?

----- 0 रुपये

----- 1 तो 10 रुपये

----- 10 से 50 रुपये

----- 50 से 100 रुपये

----- 100 से 300 रुपये.

----- 300 से 500 रुपये.

----- 500 से अधिक ----- लगभग कितने रुपये?

5- क्या आपको टी.बी. क्लीनिक आने के लिए अपना काम/स्कूल छोड़ना पड़ता है या फिर बच्चे की देखभाल के लिए पैसे देने होते हैं ?

----- हाँ: काम \_\_\_\_\_ स्कूल \_\_\_\_\_ बच्चे की देखभाल \_\_\_\_\_

----- नहीं

----- लागू नहीं होता.

6- नीचे दिए गए वाक्यों का सही\_\_\_ या गलत\_\_\_ में उत्तर दें:

सही \_\_\_ या गलत \_\_\_ टी.बी. जीवाणु से होने वाली बीमारी है.

सही \_\_\_ या गलत \_\_\_ धूम्रपान करने से तपेदिक (टी.बी.) होता है.

सही \_\_\_ या गलत \_\_\_ टी.बी. से फेफड़ों का कैंसर होता है.

सही \_\_\_ या गलत \_\_\_ टी.बी. ठीक हो सकता है.

7- आपके अनुमान से प्रति सौ रोगियों में से कितने रोगियों की अपनी दवा की डोज़ छूट जाती होगी?

100 में से \_\_\_\_\_

8- आपने जब जब अपनी दवा की डोज़ छोड़ी है तब का ध्यान करते हुए इन सवालों के सही या गलत में उत्तर दीजिये :

सही\_\_\_ या गलत \_\_\_ दवा के दुष्प्रभाव के कारण आपने एक डोज़ छोड़ी थी.

सही\_\_\_ या गलत \_\_\_ आपने डोज़ छोड़ी क्योंकि मुझे लगा कि दवा काम नहीं कर रही है और मुझे इससे कोई फायदा नहीं हो रहा.

सही\_\_\_ या गलत \_\_\_ आपने दवा की डोज़ छोड़ी क्योंकि मुझे लगा कि मैं बेहतर महसूस कर रहा हूँ और अब मुझे दवा की जरूरत नहीं है.

सही\_\_\_ या गलत \_\_\_ आपने दवा की डोज़ छोड़ी क्योंकि मैं दवा लेना भूल गया/गयी था/थी.

सही\_\_\_ या गलत \_\_\_ मैं शहर से बाहर था/ थी और क्लीनिक पर नहीं आ पाया/पायी.

सही\_\_\_ या गलत \_\_\_ आपने डोज़ छोड़ी क्योंकि मैं क्लीनिक पर आया लेकिन यहाँ कोई दवा देने वाला नहीं था.

सही\_\_\_ या गलत \_\_\_ मैं क्लीनिक नहीं आ पाया या नहीं आना चाहता था.

{अगर अनुभागी " मैं क्लीनिक नहीं आ पाया या नहीं आना चाहता था" का उत्तर हाँ में दे तो 8 A पर जाएँ. वरना 8 B पर जाएँ.}

8 A . आप क्लीनिक क्यों नहीं आ पाए या क्यों नहीं आना चाहते थे?

---

8 B क्या कोई और कारण भी है जिसकी वजह से आप अपनी दवा नहीं ले पाए?

---

9- जो रोगी टी.बी. की दवा की खुराक लेने में लापरवाही करते हैं उनके साथ क्या हो सकता है? सही या गलत में जवाब दें.

सही \_\_\_\_\_ गलत \_\_\_\_\_ वो ठीक हो सकते हैं.

सही \_\_\_\_\_ गलत \_\_\_\_\_ वो हमेशा बीमार रहेंगे और कभी ठीक नहीं होंगे.

सही \_\_\_\_\_ गलत \_\_\_\_\_ वे टी.बी.रोग से अन्य लोगों को संक्रमित कर सकते हैं.

सही \_\_\_\_\_ गलत \_\_\_\_\_ भविष्य में उनके टी. बी. का इलाज और कठिन हो सकता है.

सही \_\_\_\_\_ गलत \_\_\_\_\_ वे मर सकते हैं.

10- सही या गलत में जवाब दें अगर आपको लगता है की नीचे दिए गए विकल्प इलाज प्रक्रिया को सही तरीके से पूरा करने में मदद करेंगे.

सही \_\_\_\_\_ गलत \_\_\_\_\_ दवा लेने की समय या वक्त घटाई जाये. उदाहरण के लिए, सप्ताह में 3 से 7 बार की जगह, सप्ताह में एक बार या महीने में एक बार ही दवा लेनी हो. दवा तब भी उतनी ही प्रभावी होगी, बस आपको इसे कम बार लेना होगा. पूरे इलाज का समय पहले जैसा रहेगा.

सही \_\_\_\_\_ गलत \_\_\_\_\_ हफ्ते में 3-4 बार मोबाइल फोन पर कॉल के द्वारा या मोबाइल संदेशों के द्वारा दवा लेना याद दिलाया जाये.

सही \_\_\_\_\_ गलत \_\_\_\_\_ सही तरीके और समय से दवा लेने पर इनाम दिया जाना चाहिए.

सही \_\_\_\_\_ गलत \_\_\_\_\_ हमारी तरफ से कोई आदमी आये या आपकी फॅमिली में से कोई आपके घर पर याद दिलाये की दवाई ले लीजिये

हम ऐसे समाधान विकसित कर रहे हैं जिससे आपको अस्पताल में दवा कम बार लेनी पड़े. उदाहरण के लिए आपको सप्ताह में एक बार, दो सप्ताह में एक बार या महीने में एक बार ही अस्पताल जाना पड़े. इससे आपको तपेदिक (टी.बी.) क्लीनिक रोज नहीं जाना पड़ेगा और समय की बचत होगी.

ऐसा करने के लिए हमारे पास कई योजनाएं हैं.

A - आपको 30 बड़े कैप्सूल पहली विजिट में निगलने होंगे.

(000 साइज के ३० कैप्सूल दिखाएँ)

B - दूसरे तरीके में राईल (नैसोगैसट्रिक) नलिका द्वारा टी बी की दवा की निर्धारित खुराक आपके शरीर में रखी जाये.

(पैकेज से राईल नलिका निकल कर रोगी को दिखाएँ. अभी उन्हें दे नहीं)

राईल नलिका इस प्रकार से काम करती है: पहले डॉक्टर हाथों में साफ़ दस्ताने पहनेगा. फिर डॉक्टर राईल नलिका प्रयोग करने की प्रक्रिया आपको बताएगा. डॉक्टर ज़ाईलोकेन जेली जो की एक दवा है, नलिका पर लगाएगा जिससे रोगी को किसी प्रकार के दर्द का अनुभव न हो. यह जेली जहाँ लगाते हैं वह हिस्सा कुछ देर के लिए सुन्न हो जाता है और नलिका आराम से आपके पेट तक पहुंच जाती है. यह जेली नलिका पर लगायी जाती है और चिकना करने का काम भी करती है.

{चित्र 1 दिखाएँ}

इसके बाद ये नली आपके एक नासिका छिद्र से अंदर डाली जाएगी जैसा यहाँ दिखाया गया है. नली का एक सिरा आपके आमाशय पहुंचेगा.

{दूसरा चित्र दिखाएँ}

राईल नलिका तब प्रयोग की जाती है जब रोगी निगलने में असमर्थ होता है. तब इस नलिका के सहारे उसे खाना और दवाएं दी जाती हैं. वो यन्त्र जिसमें टी बी की दवा रखी जाती है उसे इस नलिका के प्रयोग से रोगी के पेट तक पहुँचाया जाता है. दवा यन्त्र पेट तक पहुँचाने और नलिका को हटाने का काम अस्पताल की एक ही विजिट में पूरा किया जा सकता है. इस तरह से इस पूरी प्रक्रिया में 10 मिनट से भी कम समय लगता है.

डॉक्टर दवा का यन्त्र राईल नलिका की मदद से रोगी के आमाशय में स्थापित कर देता है. यह यन्त्र आपकी दवा धीरे धीरे शरीर में छोड़ता है. जब सारी दवा आपके शरीर में पहुँच जाती है तब आपको दोबारा अस्पताल आना होता है और राईल नलिका द्वारा दोबारा दवा यन्त्र स्थापित करने की प्रक्रिया करानी होती है.

यह राईल नैसोगैसट्रिक नलिका है

{रोगी को राईल नैसोगैसट्रिक नलिका पकड़ने दें}

स- इससे अलग एक और तरीका है जिसमे २ लीटर पानी पीना होता है जिसमे दवा मिली होती है. ये दवा और पानी का पूरा मिश्रण एक ही अस्पताल विजिट में पीना होता है.

{बिसलेरी की 2 लीटर की बोतल दिखाएँ}

11- उपलब्ध विकल्पों के अनुसार ,क्या आप इन विकल्पों में से कोई अपनाना चाहेंगे? ये सभी विकल्प ,टी.बी क्लीनिक की निगरानी में सम्पन्न किये जायेंगे.

अगर आप इन्हें अपनाना चाहते हैं तो " हाँ" में जवाब दें वरना "नहीं" में.

{ सारे विकल्पों को रोगियों के सामने स्पष्ट आवाज़ में दोहराएं और उन्हें तस्वीरें दिखाएँ. उन्हें जो विकल्प चाहिए उसे चिन्हित करें.}

\_\_\_\_\_ 30 कैप्सूल्स निगलना

\_\_\_\_\_ राईल ( नैसोगैस्ट्रिक ) नलिका का प्रयोग

\_\_\_\_\_ दवा और पानी का मिश्रण 2 लीटर पीना.

{अगर रोगी उत्तर देता है "30 कैप्सूल्स निगलना" तब 11 A पर जाएँ. अगर रोगी उत्तर देता है "राईल ( नैसोगैस्ट्रिक ) नलिका का प्रयोग " तब 11 B पर जाएँ. अगर रोगी उत्तर देता है "दवा और पानी का मिश्रण 2 लीटर पीना" तब 11 C पर जाएँ}

11 A- एक बार में 30 कैप्सूल्स निगलने के लिए आप टी.बी क्लीनिक पर कितनी बार आना चाहेंगे?

\_\_\_\_\_ एक सप्ताह में एक बार

\_\_\_\_\_ महीने में दो बार

\_\_\_\_\_ महीने में एक बार

\_\_\_\_\_ दो महीने में एक बार

\_\_\_\_\_ चार महीने में एक बार

11 B- राईल नलिका के प्रयोग से दवा का यन्त्र स्थापित करने के लिए आप टी.बी.क्लीनिक कितनी बार आना चाहेंगे?

\_\_\_\_\_ एक सप्ताह में एक बार

\_\_\_\_\_ महीने में दो बार

\_\_\_\_\_ महीने में एक बार

\_\_\_\_\_ दो महीने में एक बार

\_\_\_\_\_ चार महीने में एक बार

11 C- 2 लीटर दवा और पानी का मिश्रण पीने के लिए आप टी.बी.क्लीनिक कितनी बार आना चाहेंगे?

\_\_\_\_\_ एक सप्ताह में एक बार

\_\_\_\_\_ महीने में दो बार

\_\_\_\_\_ महीने में एक बार

\_\_\_\_\_ दो महीने में एक बार

\_\_\_\_\_ चार महीने में एक बार

12- क्या आप के पेट में कभी राईल ( नैसोगैस्ट्रिक ) नलिका डाली गयी है?

\_\_\_\_\_ हाँ

\_\_\_\_\_ नहीं

\_\_\_\_\_ पता नहीं/ याद नहीं.

13- इस पैमाने पर, असुविधा के स्तर के अनुसार आप राईल नैसोगैस्ट्रिक नलिका को आप कौन सा स्थान देना चाहेंगे? \_\_\_\_\_

{चित्र ३ दिखाएँ और अनुभागी को पैमाने पर संख्या चिह्नित करने दें.}

14- इस पैमाने पर, असुविधा के स्तर के अनुसार आप एक बार में ३० कैप्सूल्स निगलने की असुविधा को कौन सा स्थान देना चाहेंगे? \_\_\_\_\_

{चित्र 3 दिखाएँ और अनुभागी को पैमाने पर संख्या चिह्नित करने दें.}

15- इस पैमाने पर, असुविधा के स्तर के अनुसार आप एकबार में 2 लीटर पानी पीने की असुविधा को आप कौन सा स्थान देना चाहेंगे? \_\_\_\_\_

जनसांख्यिकीय

\_\_\_\_\_

16- आपकी उम्र क्या है?

\_\_\_\_\_ 18 से 24 ?

\_\_\_\_\_ 25 से 34?



\_\_\_\_\_ 35 से 44?

\_\_\_\_\_ 45 से 54 ?

\_\_\_\_\_ 55 से 64?

\_\_\_\_\_ 65 से 74?

\_\_\_\_\_ 75+

17- आप कौन से लिंग से सम्बंधित हैं ?

\_\_\_\_\_ पुरुष

\_\_\_\_\_ महिला

\_\_\_\_\_ अन्य

18- आपकी पढाई का उच्चतम स्तर क्या है?

\_\_\_\_\_ कोई औपचारिक शिक्षा नहीं

\_\_\_\_\_ 1 से 5 कक्षा

\_\_\_\_\_ 6 से 8 कक्षा

\_\_\_\_\_ 9 से 10 कक्षा

\_\_\_\_\_ 11 से 12 कक्षा

\_\_\_\_\_ स्नातक \_\_\_\_\_

\_\_\_\_\_ परास्नातक \_\_\_\_\_

\_\_\_\_\_ प्रोफेशनल उपाधि \_\_\_\_\_

\_\_\_\_\_ डॉक्टरेट उपाधि \_\_\_\_\_

19- आपके रोजगार का स्तर क्या है?

मासिक वेतन पर रोजगार \_\_\_\_\_

स्वरोजगार \_\_\_\_\_

बेरोजगार और काम की तलाश जारी \_\_\_\_\_

बेरोजगार लेकिन काम की तलाश नहीं \_\_\_\_\_

घर की देख भाल \_\_\_\_\_

छात्र \_\_\_\_\_

सेवानिवृत्त \_\_\_\_\_

अन्य \_\_\_\_\_

20- आप एक दिन में कितने घंटे काम/ पढाई करते हैं?

\_\_\_\_\_ घंटे प्रतिदिन

21- आप एक सप्ताह में कितने दिन काम/ पढाई के लिए खर्च करते हैं?

\_\_\_\_\_ दिन प्रति सप्ताह

22-आप क्लीनिक पर एक सप्ताह में कितनी बार आते हैं?

\_\_\_\_\_ एक सप्ताह में एक बार

\_\_\_\_\_ एक सप्ताह में दो बार

\_\_\_\_\_ एक सप्ताह में तीन बार

\_\_\_\_\_ एक सप्ताह में चार बार

\_\_\_\_\_ एक सप्ताह में पांच बार

\_\_\_\_\_ एक सप्ताह में छह बार

\_\_\_\_\_ प्रतिदिन

\_\_\_\_\_ दो सप्ताह में एक बार

\_\_\_\_\_ महीने में एक बार या उससे भी कम

23- एक सामान्य विजिट में क्लीनिक में आने से लेकर क्लीनिक से जाने के बीच में आपका कितना समय लगता है?

\_\_\_\_\_ 10 मिनट से कम

\_\_\_\_\_ 10 से 30 मिनट

\_\_\_\_\_ 30 से 60 मिनट

\_\_\_\_\_ 60 मिनट से ज्यादा--- लगभग कितना समय? \_\_\_\_\_

24- क्या आप अपने क्लीनिक के अनुभव के बारे में हमें कुछ बताना चाहते हैं?

\_\_\_\_\_
